# Supplementary material for: Residual malaria transmission dynamics varies across The Gambia despite high coverage of control interventions
Source: PLoS One. 2017 Nov 2;12(11):e0187059. doi: 10.1371/journal.pone.0187059 (PMC5667860; doi:10.1371/journal.pone.0187059)
Supplement: S1 File — (PDF) [file pone.0187059.s002.pdf]

# SCC 1318 MALARIA TRANSMISSION DYNAMICS IN GAMBIA

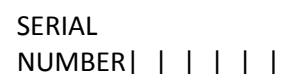

## PARTICIPANT MONTHLY CASE REPORT FORM (2013)

| GENERAL INFORMATION                                            |                                                                                                                                                                                                                                                                             |
|----------------------------------------------------------------|-----------------------------------------------------------------------------------------------------------------------------------------------------------------------------------------------------------------------------------------------------------------------------|
| 1                                                              | Date of visit: ____/____/____ ( DD/MM/YYYY)                                                                                                                                                                                                                                 |
| 2                                                              | Study ID: ____ (e.g. A00200101)                                                                                                                                                                                                                                             |
| MALARIA                                                        |                                                                                                                                                                                                                                                                             |
| 3                                                              | Have you had a fever in the last month? 1- Yes 2- No 3- Don't know <b>(If No skip to Q 8)</b>                                                                                                                                                                               |
| 4                                                              | Did you do a RDT? 1- Yes 0- No Don't know (if No go to Q6)                                                                                                                                                                                                                  |
| 5                                                              | What was the RDT result 1- Positive 2- Negative 3- Don't know                                                                                                                                                                                                               |
| 6a                                                             | Where did you receive treatment for your fever?<br>1- Government hospital    2- Private clinic/hospital    3- Pharmacy    4- VHW    5 - Mobile clinic<br>6- Shop    7- Traditional healer    8- Marabou    9- Friends/family<br>10- No treatment    11- Other specify _____ |
| 6b                                                             | Did you consult anyone else for your illness (such as another health worker, or marabout or someone else for your health? 1- Yes 2-No                                                                                                                                       |
| 7                                                              | What antimalarial medication did you receive? <b>(Tick all that apply)</b><br>1- Coartem    2- Fansidar    3- Chloroquine    4- Other specify _____<br>5 - Don't know                                                                                                       |
| 8                                                              | Have you had a fever in the last 24 hours? 1- Yes 0- No <b>(If No skip to Q 10)</b>                                                                                                                                                                                         |
| <b>If history of fever in the last 24 hours perform an RDT</b> |                                                                                                                                                                                                                                                                             |
| 9                                                              | RDT result 1- Positive 2- Negative 3- Don't know                                                                                                                                                                                                                            |
| BEDNET USE                                                     |                                                                                                                                                                                                                                                                             |
| 10                                                             | Did you sleep under your bed net                                                                                                                                                                                                                                            |
| A                                                              | Last night 1- Yes 0- No                                                                                                                                                                                                                                                     |
| B                                                              | The night before last 1- Yes 0- No                                                                                                                                                                                                                                          |
| 11                                                             | In the past 1 month have you sometimes slept outside the house?<br>1 - Yes    0 - No                                                                                                                                                                                        |
| 12                                                             | If yes, did you use a bed net when you slept outside?<br>1 - Yes    0 - No                                                                                                                                                                                                  |
| 13                                                             | In the last 1 month have you travelled out of the village? e.g. cultivating the fields, herding cattle, or during other work activities? <b>(If No skip to Q 16)</b><br>1- Yes 0- No                                                                                        |
| 14                                                             | If Yes how many days did you stay outside the village? ____ (days)                                                                                                                                                                                                          |

| 15                                                                                                                                   | Did you sleep under a bed net when you stayed outside the village?<br>1- Yes    0- No                                                                                                                   |
|--------------------------------------------------------------------------------------------------------------------------------------|---------------------------------------------------------------------------------------------------------------------------------------------------------------------------------------------------------|
| <b>PHYSICAL EXAMINATION</b>                                                                                                          |                                                                                                                                                                                                         |
| 16                                                                                                                                   | Axillary Temperature  ____ ____ ._____° C<br><i>(If axillary temperature 37.5°C or more, perform a RDT)</i>                                                                                             |
| 17                                                                                                                                   | RDT result?                  1- Positive    2-Negative                                                                                                                                                  |
| <b>SAMPLE COLLECTION,</b><br><i>(always take a blood slide, collect 3 blood spots samples on filter paper and check haemoglobin)</i> |                                                                                                                                                                                                         |
|                                                                                                                                      | <div style="text-align: center;"> <b>Sample label Unique ID</b><br/>           (Village letter  Compound No.  HH No.  Collection Time point (A-G) <br/>           Year (e.g. C0010101A1)         </div> |
| 18                                                                                                                                   | Thick blood smear collected on slide                                                                                                                                                                    |
| 19                                                                                                                                   | Three (3) dried blood spots collected?                                                                                                                                                                  |
| 20                                                                                                                                   | Hemoglobin result                                                                                                                                                                                       |

Nurse Field Workers Name: \_\_\_\_\_ Initials: \_\_\_\_\_

Date: | | | / | | | / | | | |
